# Supplementary material
Source: Springer Nature journal article supplement (https://www.springermedizin.de/resource/supplementary/12885_2006_564_MOESM4_ESM.pdf/9469784)
Supplement: MOESM4 [file 9469784]

| M1 | M2 | M3 | M4 | M5 | M6 | Loci    |
|----|----|----|----|----|----|---------|
|    | ■  |    | ■  |    | ■  | APC     |
|    |    |    | ■  |    |    | P16     |
|    | ■  |    |    |    | ■  | MINT31  |
|    |    |    |    |    |    | PTEN    |
| ■  | ■  |    | ■  |    |    | RAR-β2  |
|    |    |    |    |    |    | BRCA1   |
|    |    |    |    |    |    | p14     |
|    |    |    |    |    |    | p15     |
|    |    |    |    |    | ■  | RIZ1    |
|    |    |    |    |    | ■  | TMS1    |
|    |    |    | ■  |    |    | CASP8   |
|    |    |    |    |    |    | CDH13   |
|    |    |    | ■  |    |    | hMLH1   |
|    |    |    | ■  |    |    | p73     |
|    | ■  |    |    |    |    | CDH1    |
|    | ■  |    |    |    |    | DAPK    |
|    | ■  | ■  | ■  | ■  | ■  | HIC     |
|    |    |    |    |    |    | MGMT    |
|    | ■  | ■  | ■  |    |    | MINT1   |
|    |    |    |    |    |    | MINT2   |
|    | ■  | ■  | ■  | ■  | ■  | RASSF1A |
|    |    |    |    |    |    | ALX3    |
| ■  | ■  | ■  | ■  | ■  | ■  | AR      |
|    |    |    |    |    |    | BRCA2   |
|    |    |    |    |    |    | CACNA1G |
| ■  | ■  | ■  | ■  | ■  | ■  | FHIT    |
|    |    |    |    | ■  | ■  | hMSH2   |
|    |    |    |    |    |    | HMSH3   |
|    |    | ■  | ■  | ■  | ■  | MINT32  |
|    |    |    |    |    |    | RB      |
|    |    |    |    |    |    | STK11   |
|    |    |    |    | ■  | ■  | THBS1   |
|    |    |    |    |    |    | TIMP    |
|    |    |    |    |    |    | VHL     |
